# Supplementary material for: Surface Decarburization Depth Detection in Rods of 60Si2Mn Steel with Magnetic Barkhausen Noise Technique
Source: MDPI journal article supplement (doi:10.3390/s23010503), 2023-01-02
Supplement: s1 [file s1]

## Supporting Information

### Surface Decarburization Depth Detection in Rods of 60Si2Mn Steel with Magnetic Barkhausen Noise Technique

Peng Li <sup>1</sup>, Xianxian Wang <sup>1</sup>, Dongdong Ding <sup>1</sup>, ZhaoXiang Gao <sup>1</sup>, Wen Fang <sup>2</sup>, Chaolei Zhang <sup>2</sup>, Cunfu He <sup>1</sup>, and Xiucheng Liu<sup>1, \*</sup>

<sup>1</sup> Faculty of Information Technology, Beijing University of Technology, Beijing 100124, China

<sup>2</sup> School of Materials Science and Engineering, University of Science and Technology Beijing, Beijing 100083, China

\* Correspondence: xiuchliu@bjut.edu.cn; Tel.: +86-010-6739-1720

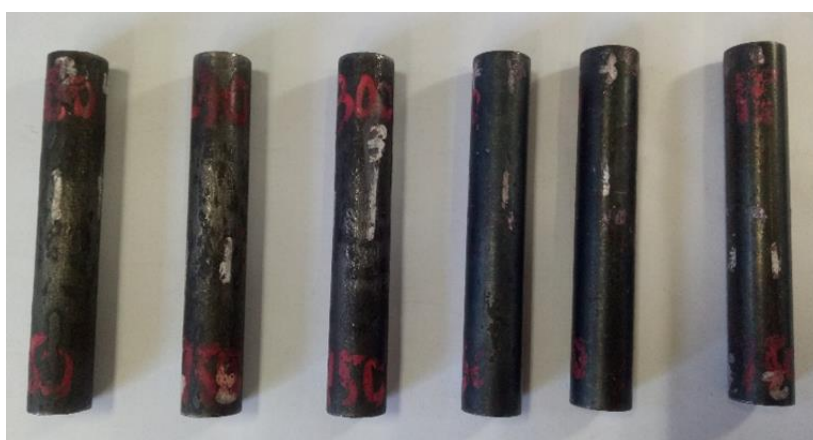

Figure S1. Photograph of spring steel rods.

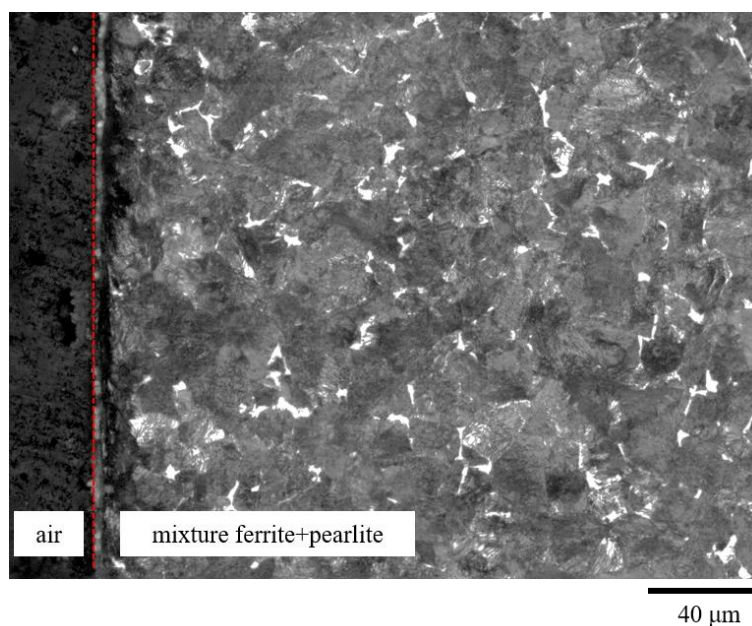

Figure S2. Metallographic picture of the as- received steel sample without any decarburized layer.
